# Supplementary material
Source: ML conference proceedings conference paper supplement (https://openaccess.thecvf.com/content/CVPR2024/html/Takimoto_Dr.Hair_Reconstructing_Scalp-Connected_CVPR_2024_paper.html)
Supplement: Supplementary file 2 [file Takimoto_Dr.Hair_Reconstructing_Scalp-Connected_CVPR_2024_supplemental.zip]

Archive with 2 entries (2 files):
- 4334_supp/4334_supp.mp4
- 4334_supp/4334_supp.pdf
